# Supplementary material for: Associations of BMI and Body Fat with Urine Metabolome in Adolescents Are Sex-Specific: A Cross-Sectional Study
Source: MDPI journal article supplement (doi:10.3390/metabo10080330), 2020-08-13

## Supplemental Material

**Figure S1:** Directed acyclic graph for the association between body composition and the urinary metabolome in adolescents

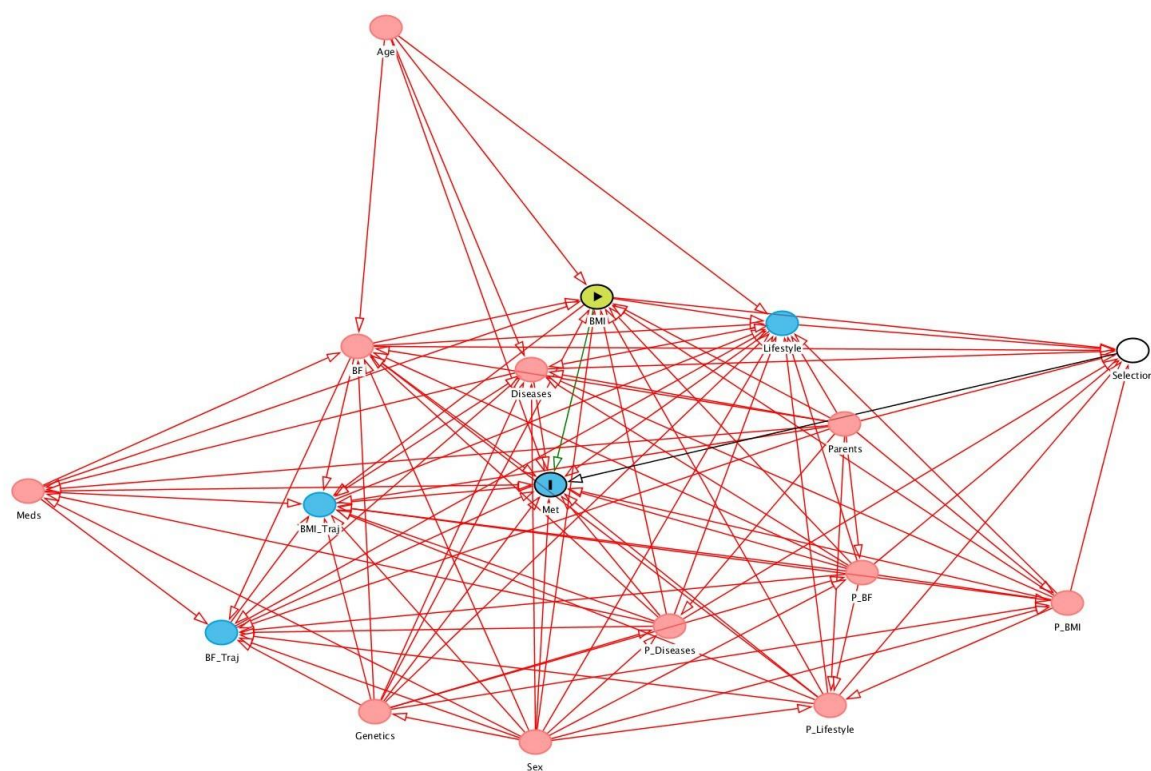

Supplement: s1 [file s1]
